# Supplementary material
Source: Springer Nature journal article supplement (https://www.springermedizin.de/resource/supplementary/13012_2012_538_MOESM2_ESM.pdf/9629988)
Supplement: MOESM2 [file 9629988]

**Phase 1:  
Evidence reports**

**Systematic review**

Diagnostic accuracy of  
B<sub>12</sub>/folate tests

**Utilisation**

Examination of Medicare  
data to determine basic  
utilisation patterns

**Pathology audit**

Examination of routinely  
collected laboratory data to  
determine B<sub>12</sub>/folate test  
positivity rates

**Guideline review**

Identification &  
examination of advice  
provided by current clinical  
practice guidelines

**Phase 2:  
Stakeholder engagement**

**General  
Practitioners (1)**

Exploration of  
utilisation; evidentiary  
requests

**Pathology  
providers:**

Exploration of  
utilisation; evidence;  
potential for change

**General  
Practitioners (2):**

Exploration of evidence;  
potential for change

**Specialists:**

Exploration of  
utilisation; evidence;  
potential for change

**Community:**

Role of testing;  
expectations; value of  
test with uncertain  
evidence base

**Phase 3:  
Policy deliberation & analysis  
Process evaluation**

Policy advisors (Federal)
